1                   **Broad-Spectrum Antifungal Activities and Mechanism of Drimane**

2                                           **Sesquiterpenoids**

3           Edruce Edouarzin<sup>1</sup>, Connor Horn<sup>2</sup>, Anuja Paduyal<sup>2</sup>, Cunli Zhang<sup>1</sup>, Jianyu Lu<sup>1</sup>, Zongbo Tong<sup>1</sup>,

4                   Guri Giaever<sup>3</sup>, Corey Nislow<sup>3</sup>, Raja Veerapandian<sup>2</sup>, Duy H. Hua<sup>1</sup> and Govindsamy

5                                           Vediyappan<sup>2\*</sup>

6           <sup>1</sup>Department of Chemistry, 1212 Mid Campus Drive North, Kansas State University, Manhattan,

7                                           KS 66506 U. S. A.

8           <sup>2</sup>Division of Biology, 1717 Claflin Road, Kansas State University, Manhattan, KS 66506

9                                           U. S. A.

10           <sup>3</sup>Faculty of Pharmaceutical Sciences, University of British Columbia, Vancouver, BC Canada

11                                           V6T 1Z3

12  
13  
14  
15

16           **Running title:** Drimenol, a broad-spectrum fungicidal antifungal agent

17  
18  
19

20           **Corresponding author**

21  
22

\* [gvediyap@ksu.edu](mailto:gvediyap@ksu.edu)

23  
24

25 **ABSTRACT**

26           Eight drimane sesquiterpenoids including (-)-drimenol and (+)-albicanol were synthesized  
27 from (+)-sclareolide and evaluated for their antifungal activities. Three compounds, (-)-drimenol,  
28 (+)-albicanol, and (1*R*,2*R*,4*aS*,8*aS*)-2-hydroxy-2,5,5,8*a*-tetramethyl-decahydronaphthalene-1-  
29 carbaldehyde (**4**) showed strong activity against *C. albicans*. (-)-Drimenol, the strongest inhibitor  
30 of the three, (at concentrations of 8 – 64 µg/ml, causing 100% death of fungi), acts not only against  
31 *C. albicans* as a fungicidal manner, but also inhibits other fungi such as *Aspergillus*, *Cryptococcus*,  
32 *Pneumocystis*, *Blastomyces*, *Fusarium*, *Rhizopus*, *Saksenaea* and FLU resistant strains of *C.*  
33 *albicans*, *C. glabrata*, *C. krusei*, *C. parapsilosis* and *C. auris*. These observations suggest drimenol  
34 is a broad-spectrum antifungal agent. At high concentration (100 µg/ml), drimenol caused a  
35 rupture of the fungal cell wall/membrane. In a nematode model of *C. albicans* infection, drimenol  
36 rescued the worms from *C. albicans*-mediated death, indicating drimenol is tolerable and bioactive  
37 in a metazoan. Genome-wide fitness profiling assays of both *S. cerevisiae* (nonessential  
38 homozygous and essential heterozygous) and *C. albicans* (Tn-insertion mutants) collections  
39 revealed putative genes and pathways affected by drimenol. Using a *C. albicans* mutants spot  
40 assay, the Crk1 kinase associated gene products, Ret2, Cdc37, and novel putative targets  
41 orf19.759, orf19.1672, and orf19.4382 were revealed to be the potential targets of drimenol.  
42 Further, computational modeling results suggest possible modification of the structure of drimenol  
43 including the A ring for improving antifungal activity.

44

45

46

47

## 48 INTRODUCTION

49 Life-threatening fungal infections are an important cause of morbidity and mortality,  
50 particularly for patients with immune deficiency and those who are undergoing chemotherapeutic  
51 treatments. Some of the leading invasive fungal pathogens include *Candida* sp., *Aspergillus* sp.  
52 and *Cryptococcus* sp. Currently, the antifungal therapeutic options are limited, especially when  
53 compared to available antibacterial agents (1-4). Among the five classes of antifungals, azoles,  
54 echinocandins, polyenes, allylamines, and pyrimidine derivatives, only three are used clinically;  
55 azoles, echinocandins, and polyenes. Azole drugs, such as fluconazole (FLU), inhibit ergosterol  
56 synthesis through inhibition of lanosterol 14- $\alpha$ -demethylase, impairing formation of the fungal  
57 cell wall. Echinocandins, such as caspofungin (CAS), block 1,3- $\beta$ -glucan synthase and lead to  
58 depletion of glucan in fungal cell wall. Polyenes, including amphotericin B (AMB), bind to  
59 ergosterol in fungal cell membrane and change the cell membrane transition temperature, resulting  
60 in leakage of ions and small organic molecules, and eventual cell death. Allylamines, such as  
61 amorolfin, affect ergosterol synthesis by inhibition of squalene epoxidase. Pyrimidines, such as  
62 flucytosine (or 5-fluorocytosine), block nucleic acid synthesis, leading to the inhibition of protein  
63 synthesis (5, 6). No new antifungal agents have been approved by Food and Drug Administration  
64 since 2006 (2) and the latest antimycotic agents, echinocandins, were developed over 30 years ago  
65 (7, 8). Thus, new broad-spectrum antifungal agents are sorely needed to overcome the increasing  
66 emergence of antifungal drug resistance.

67 *C. albicans* is the most frequently found fungal pathogen in humans and costs the US health  
68 care system around \$3 billion annually in treatment and lost productivity. *C. albicans*, a  
69 polymorphic fungus, exists as yeast, pseudohyphal and hyphal forms, with each contributing to its  
70 virulence. While the yeast form is essential for dissemination, the hyphal form is critical for

71 invasion of cells, immune evasion, and biofilm formation. Furthermore, the ability to switch  
72 between forms is also essential for pathogenicity. Traditional antimycotics have many drawbacks,  
73 including toxicity to human cells, a limited range of cellular targets, the development of antifungal  
74 resistance (9-12), and the failure to successfully control pathogenesis. To develop new antifungal  
75 agents based on drimane sesquiterpenes, we have investigated synthetic drimane terpenes, (-)-  
76 drimenol (**1**) and (+)-albicanol (**2**), along with six analogs, **3 – 8 (Fig. 1)**, for their antifungal  
77 activities and identified (-)-**1** as a potent broad-spectrum fungicidal agent. Moreover, we  
78 determined their mechanism of action through forward genetic screening of mutant libraries of *C.*  
79 *albicans* and baker's yeast and found that (-)-**1** affects the fungal activities of protein secretion,  
80 vacuolar biogenesis, chromatin remodeling and cyclin dependent protein kinases (CDK) activity.

81

## 82 **RESULTS**

83 Several drimane sesquiterpenoids were synthesized in our laboratory during the total synthesis of  
84 (+)-chloropuupehenone, a natural product from marine sponges (13). Based on the  
85 antimycobacterial activity of sesquiterpene natural product, cinnamodial, isolated from the  
86 liverwort plant, *Warburgia salutaris* (14), we anticipated that drimane sesquiterpenes and closely  
87 related compounds (15) could be effective antimycotics for *C. albicans*. Five representative  
88 drimane terpenes, **1 – 5**, along with their derivatives, **6 – 8 (Fig. 1)**, were screened for their ability  
89 to inhibit *C. albicans* growth. It was assumed that additional hydroxyl group(s) or oxygen atoms  
90 in the molecule enhances water solubility and may improve bioactivity (16). Molecules **3 – 7**  
91 possess extra hydroxyl, aldehyde, or acetoxy function and molecule **8** contains an acetonide moiety  
92 in the drimane structure.

93

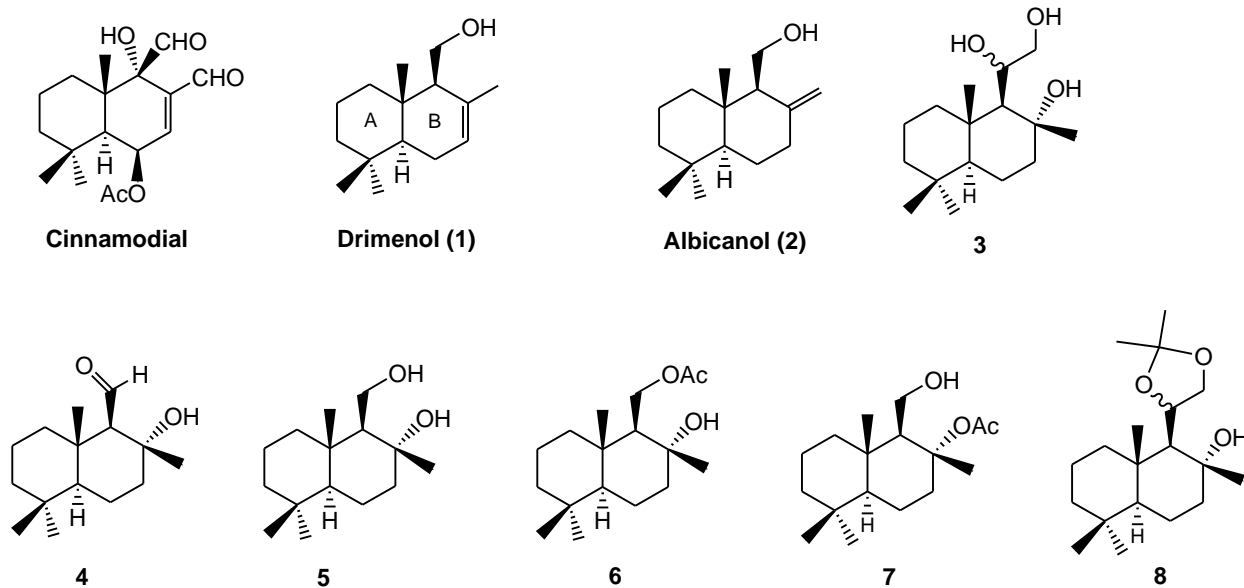

94

95 **FIG. 1.** Drimane sesquiterpenoids bioevaluated for their antifungal activities.

96

97 Compounds **1** – **5** were prepared by following previously reported methods (13). Molecule  
98 **6** was prepared from a mono-acetylation of **5** with acetic anhydride and pyridine in  
99 dichloromethane (Scheme 1). Molecule **7** was made by a sequence of three reactions: (i) silylation  
100 of the primary alcohol with *t*-butyldimethylsilyl chloride and imidazole in dichloromethane; (ii)  
101 acetylation of the tertiary alcohol with acetyl chloride and pyridine; and (iii) removal of the silyl  
102 ether group with tetra-*n*-butylammonium fluoride in THF. Compound **8** was produced from the  
103 treatment of triol **3** with 2,2-dimethoxypropane and a catalytic amount of *p*-toluenesulfonic acid  
104 in toluene. The experimental procedures were described in Materials and Methods section.

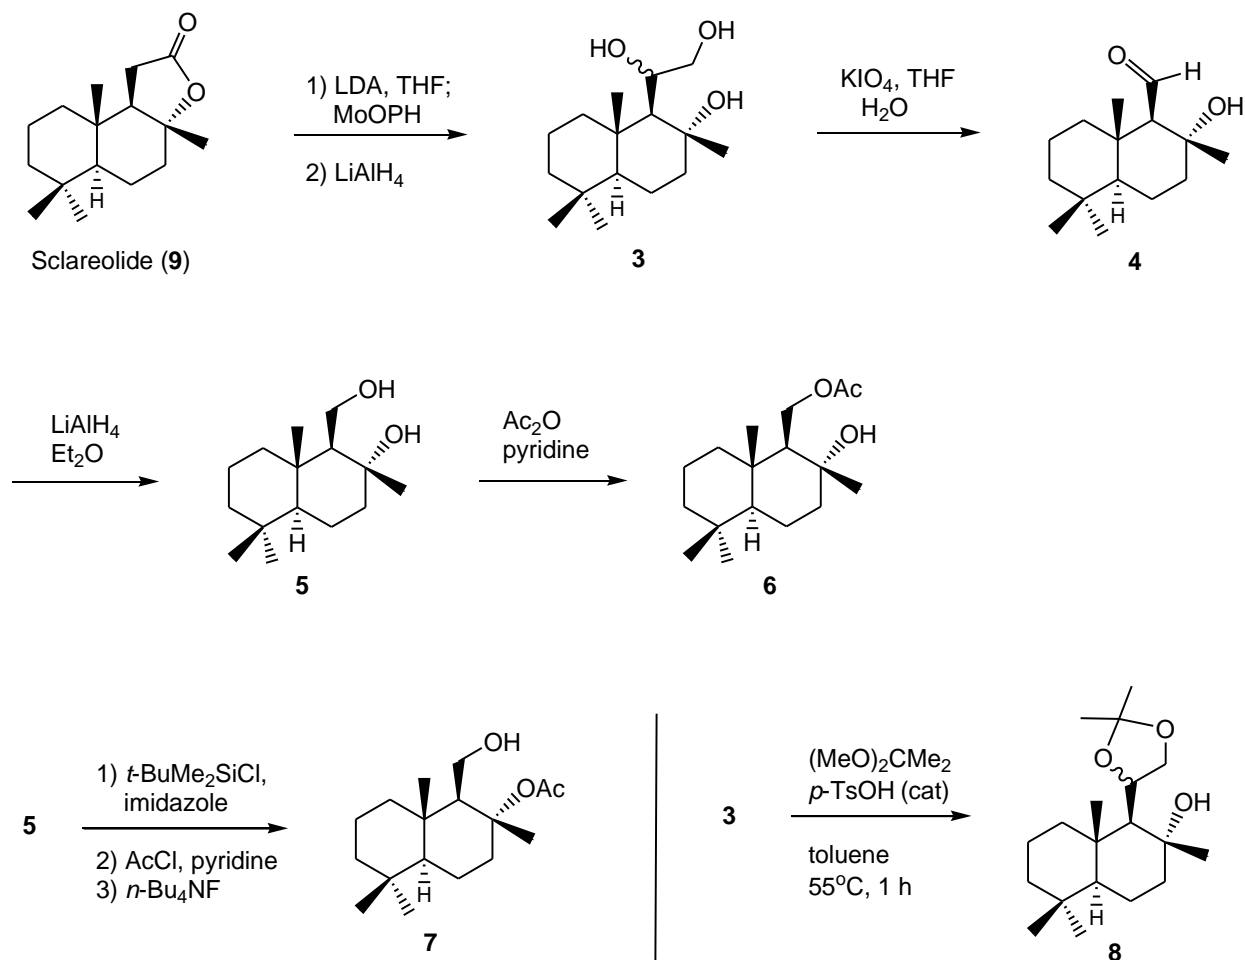

105

106 **Scheme 1.** Synthesis of drimane sesquiterpenoids **3** – **8**.

107       Examination of the antifungal activities of these molecules along with the mechanistic  
108 study of the most active molecule may allow future improvement in bioactivity and reduction in  
109 toxicity. We used *C. albicans* strain SC5314 for our initial screening of antifungal activities of  
110 drimane sesquiterpenoids **1** – **8**. The compounds were solubilized in dimethyl sulfoxide (DMSO),  
111 10 mg/ml, as stock solutions and stored at -20°C. Prior to assays, stock solutions of compounds  
112 were diluted to 200 – 12.5 µg/ml in the growth media for yeast antifungal assays using the Clinical  
113 and Laboratory Standards Institute (CLSI) M38-A2 method (17). Fortuitously, we found (-)-  
114 drimenol (**1**) and (+)-albicanol (**2**) along with compound **4**, inhibit *C. albicans* SC5314 growth  
115 (**Table 1**). Among these three compounds, we identified **1** being more potent (with MIC value

116 ~30 µg/ml) than other compounds (~60 µg/ml); therefore **1** was used for further studies including  
117 mechanistic investigation.

118

119 **Table 1.** Antifungal activities of drimane sesquiterpenoids **1 – 8** against *C. albicans* SC5314.

120 Highest activity: +++++; medium activity: ++++; and low activity: ++.

121

| Molecule            | <b>1</b> | <b>2</b> | <b>3</b> | <b>4</b> | <b>5</b> | <b>6</b> | <b>7</b> | <b>8</b> |
|---------------------|----------|----------|----------|----------|----------|----------|----------|----------|
| Antifungal activity | +++++    | ++       | Inactive | +++      | Inactive | Inactive | Inactive | Inactive |

122

### 123 **Antifungal activities of drimenol against various pathogenic fungi**

124 Since our initial assay with *C. albicans* confirmed the antifungal activities of **1**, we  
125 extended the susceptibility assays to other pathogenic fungi including FLU resistant *C. albicans*,  
126 various species of candida, *Cryptococcus*, *Aspergillus* and a dermatophyte fungus. The CLSI broth  
127 dilution methods of M27-A3 for yeasts and M38-A2 for filamentous fungi (17) were used to  
128 determine the susceptibility. Molecule **4** was not investigated due to the presence of an aldehyde  
129 function, which may react with biological molecules.

130 Briefly, yeast cells or conidia (for filamentous fungi) were suspended in RPMI 1640  
131 medium to a final concentration of 10<sup>5</sup> cfu/ml and distributed in 96-well microplate to a total  
132 volume of 100 µl/well. Molecules **1** was added to the wells and two-fold serial dilutions prepared.  
133 Duplicates were used for each concentration and wells with or without DMSO served as controls.  
134 Plates were incubated without shaking at 37°C for 24 – 48 h for yeasts and 30°C for 4 days for  
135 filamentous fungi (*Aspergillus* and *Trichophyton* sp). The MIC was defined as the lowest

136 compound concentration at which no growth occurred, as determined visually and microscopically  
137 (an inverted microscope). The results are shown in **Fig. 2** and some (*C. glabrata* [BG2], *C.*  
138 *albicans* [FLU resistant], *C. auris*, *T. equinum*) in **Table 2**.  
139

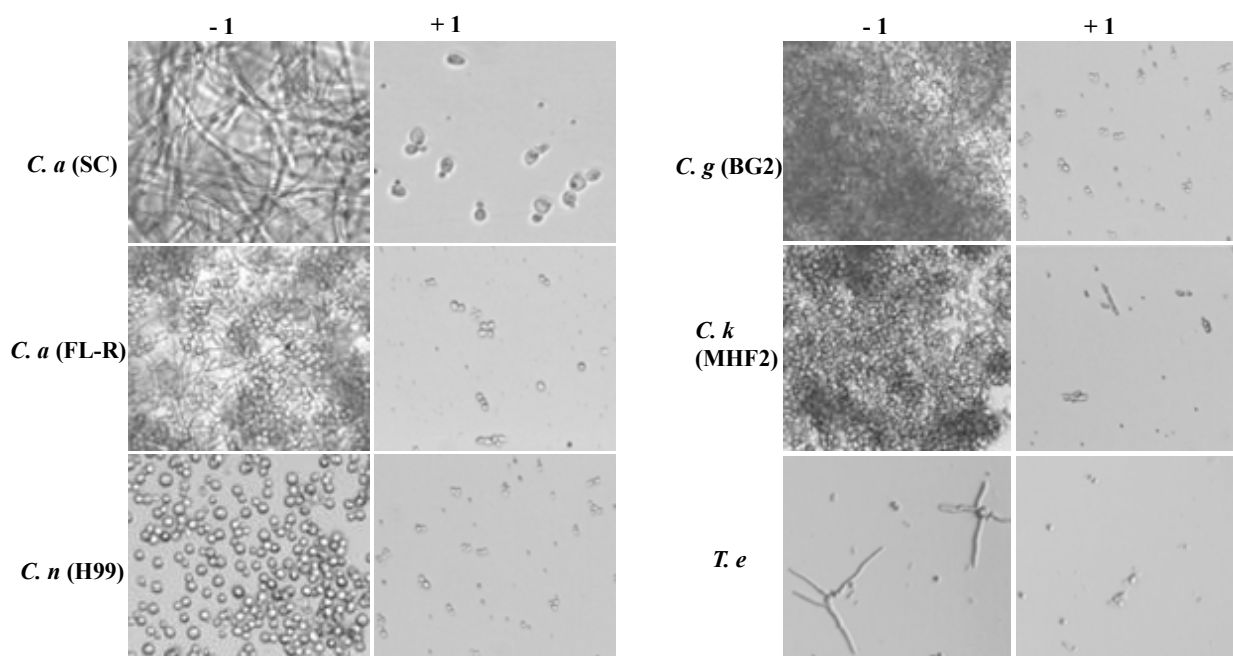

140

141

142 **FIG. 2.** Antifungal activity of **1** against various human pathogenic fungi. The CLSI broth dilution  
143 methods of M27-A3 for yeasts and M38-A2 for filamentous fungi were used. Drimenol (**1**) was  
144 dissolved in DMSO and a two fold serial dilution was used between 200 - 12.5  $\mu\text{g/ml}$ .  
145 Representative microscopic images (Leica, inverted microscope) taken at 200X magnification  
146 from **1** with cells exposed 50  $\mu\text{g/ml}$  (MIC), except *T. equinum* which was exposed to 15  $\mu\text{g/ml}$  at  
147 30 °C, are shown. The MIC for **1** is 50  $\mu\text{g/ml}$  under these assay conditions except mentioned  
148 otherwise. *C. a* (SC), *Candida albicans* (SC5314); *C. a* (FL-R), *C. albicans* FLU-resistant; *C. g*  
149 (BG2), *C. glabrata* (BG2); *C. k* (MHF2), *C. krusei* (MHF2); *C. n* (H99), *Cryptococcus*  
150 *neoformans* (H99); *T. e*, *Trichophyton equinum*.



151  
152 Results summarized in **Fig. 2** show that **1** has broad-spectrum fungicidal activity against various  
153 fungi including FLU resistant *C. albicans* and *Cryptococcus* sp albeit, at a higher (50 µg/ml) MIC  
154 concentration. However, for a dermatophyte fungus, the MIC value was lower, 15 µg/ml. When  
155 compared to DMSO controls, fungi exposed to **1** showed absence of fungal growth. At higher  
156 concentration of **1** (100 µg/ml), *C. albicans* yeast cells lysed and released their cellular contents  
157 (**Fig. 3**, arrow). Consistent with this observation, **1** inhibited the germination of *A. nidulans* spores  
158 and appeared to cause swelling of germinating spores (**Fig. 3**, lower right).

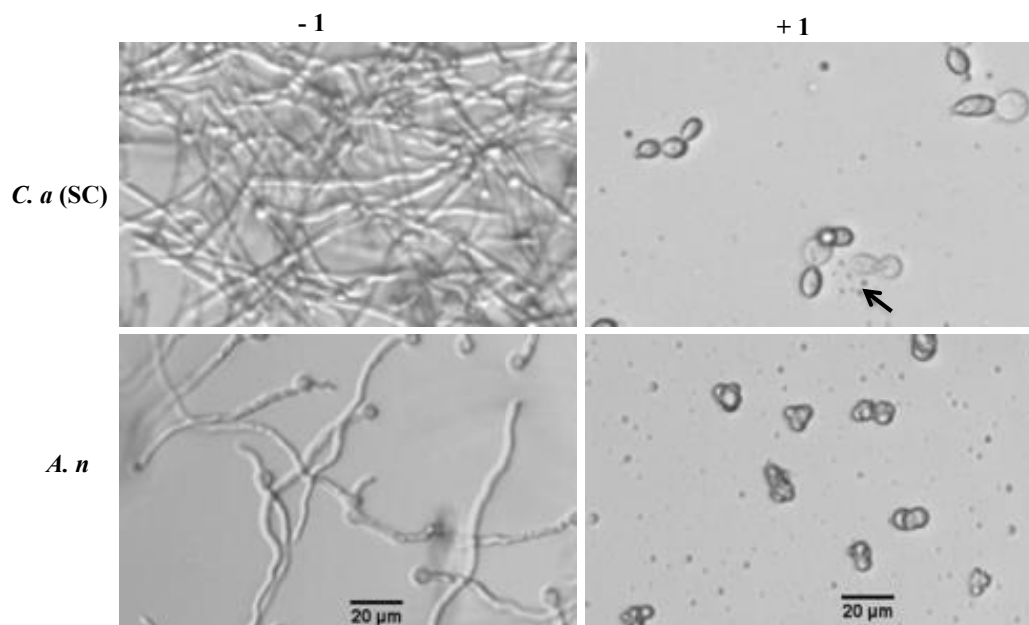

159  
160  
161 **FIG. 3.** Antifungal activity of **1** against *C. albicans* and *A. nidulans*. The CLSI broth dilution  
162 methods of M27-A3 for yeasts and M38-A2 for filamentous fungi were used. *C. albicans*  
163 (SC5314) showed lysis of yeast cells (arrow) at 100 µg/ml of **1** compared to the control where a  
164 network of hyphal growth was observed. Similarly, the germination of *Aspergillus nidulans* spores

165 was inhibited by **1** (lower, right panel). Representative microscopic images (Leica, inverted  
166 microscope) were shown. Scale bar, 20  $\mu\text{m}$ .

167  
168 To extend our antifungal screening with **1** against additional human pathogenic fungi, we have  
169 used the non-clinical and pre-clinical service program offered by the NIH NIAID supported fungus  
170 testing center at the University of Texas Health Sciences Center, San Antonio. The fungus testing  
171 center used the CLSI M38-A2 method (17) to determine the MIC of **1** after 24 - 72 hours incubation  
172 with concentrations ranging from 0.125 - 64  $\mu\text{g/ml}$ . Positive control antifungals (FLU,  
173 posaconazole and voriconazole) were also included in parallel. The results are summarized in  
174 **Table 2**.

175  
176 **Table 2**. Drimenol (**1**) activities against various pathogenic fungi. The MIC (100% growth  
177 inhibition) of **1** ranges from 8  $\mu\text{g/ml}$  to 64  $\mu\text{g/ml}$ . Fluconazole, posaconazole, and voriconazole  
178 were used as controls.

179

| Antifungal             |             | Drimenol |      | Fluconazole | Posaconazole | Voriconazole |
|------------------------|-------------|----------|------|-------------|--------------|--------------|
| Species                | Isolate No. | 50%      | 100% | 50%         | 100%         | 100%         |
| <i>C. parapsilosis</i> | CLSI QC     | 32       | 32   | 1           | -            | -            |
| <i>C. krusei</i>       | CLSI QC     | 32       | >64  | 16          | -            | -            |
| <i>P. variotii</i>     | CLSI QC     | 16       | 32   | -           | $\leq 0.03$  | 0.125        |
| <i>C. albicans</i>     | CA1         | 32       | 32   | 0.125       | -            | -            |
|                        | CA2         | 32       | >64  | 0.25        | -            | -            |
|                        | CA3         | 32       | 32   | >64         | -            | -            |
| <i>C. neoformans</i>   | CN1         | 16       | 32   | 4           | -            | -            |
|                        | CN2         | 8        | 64   | 64          | -            | -            |
|                        | CN3         | 16       | 32   | 64          | -            | -            |
| <i>A. fumigatus</i>    | AF1         | 16       | 32   | -           | -            | 0.5          |
|                        | AF2         | 8        | 32   | -           | -            | 2            |
|                        | AF3         | 16       | 32   | -           | -            | 4            |
| <i>Fusarium</i>        | FO1         | >64      | >64  | -           | -            | 4            |

|                             |                     |     |     |   |       |       |
|-----------------------------|---------------------|-----|-----|---|-------|-------|
|                             | FO2                 | >64 | >64 | - | -     | 8     |
|                             | FS1                 | 32  | 64  | - | -     | 8     |
| <i>Scedosporium</i>         | LP1                 | 16  | >64 | - | -     | >16   |
|                             | SA1                 | 16  | >64 | - | -     | 1     |
|                             | SB1                 | 16  | >64 | - | -     | 2     |
| <i>Rhizopus</i>             | RA1                 | 32  | 32  | - | 0.25  | -     |
|                             | RA2                 | 32  | 32  | - | 0.25  | -     |
|                             | RA3                 | 64  | >64 | - | 0.25  | -     |
| <i>Apophysomyces</i>        | AP01                | 32  | >64 | - | ≤0.03 | -     |
|                             | AP02                | 32  | >64 | - | 0.25  | -     |
| <i>Saksenaea</i>            | SAK1                | 16  | 16  | - | ≤0.03 | -     |
|                             | SAK2                | 32  | 64  | - | 0.06  | -     |
|                             | SAK3                | 4   | 32  | - | ≤0.03 | -     |
| <i>Blastomyces</i>          | BD1                 | 8   | 8   | - | -     | 0.5   |
|                             | BD2                 | 4   | 16  | - | -     | 0.06  |
|                             | BD3                 | 4   | 8   | - | -     | ≤0.03 |
| <i>C. glabrata</i>          | BG2                 | 30  | 50  | - | -     | -     |
| <i>C. albicans</i>          | 95-98-flu resistant | 30  | 50  | - | -     | -     |
| <i>C. auris</i>             |                     | 30  | 50  | - | -     | -     |
| <i>Trichophyton equinum</i> |                     | -   | 15  | - | -     | -     |

180

181 Next, we determined the viability of fungal cells that were exposed to **1**. Cells exposed to  
 182 50 µg/ml (MIC) for 24 h or at 100 µg/ml for 48h were used. To determine the viability of treated  
 183 fungal cells, small volumes (1 - 5 µg/ml) of mixed cell suspensions were removed from wells and  
 184 spotted on YPD agar medium. The agar plates were incubated at 30°C for 24 h - 72 h and the  
 185 growth of fungi were recorded. Growth of yeasts occur in 24 h and filamentous fungi in 48 - 72 h  
 186 for control (without **1**) but not for those treated with **1** suggesting that it acts as a fungicidal  
 187 compound (data not shown).

188

### 189 **Drimenol acts better than fluconazole against *Candida auris* growth**

190 *C. auris* is an emerging multidrug resistant fungal pathogen that is known to cause nosocomial  
 191 infections with ‘superbug’-like traits (18). *C. auris* was first discovered in 2009 in Southeast Asia

192 and now it is present in 33 countries across 6 continents. Since this fungus is resistant to all  
193 antifungals and is invasive, the mortality rate is high (19). Recently, CDC has issued a clinical  
194 health emergency warning about this fungus. Since **1** showed a broad-spectrum fungicidal activity,  
195 we determined its effect against *C. auris* growth using a bioscreen-C growth monitoring system.  
196 *C. auris* was grown in the presence or absence of **1** in RPMI medium (CLSI method) (17) for 24  
197 h at 37° C. Negative controls (solvent) and positive controls (FLU) were included in parallel.  
198 Results depicted in **Fig. 4** indicate that **1** inhibited *C. auris* growth completely at 60 µg/ml. In  
199 contrast, FLU at the same concentration (60 µg/ml) showed poor inhibition of growth. Thus, **1**  
200 could be useful as a broad-spectrum fungicidal compound.  
201

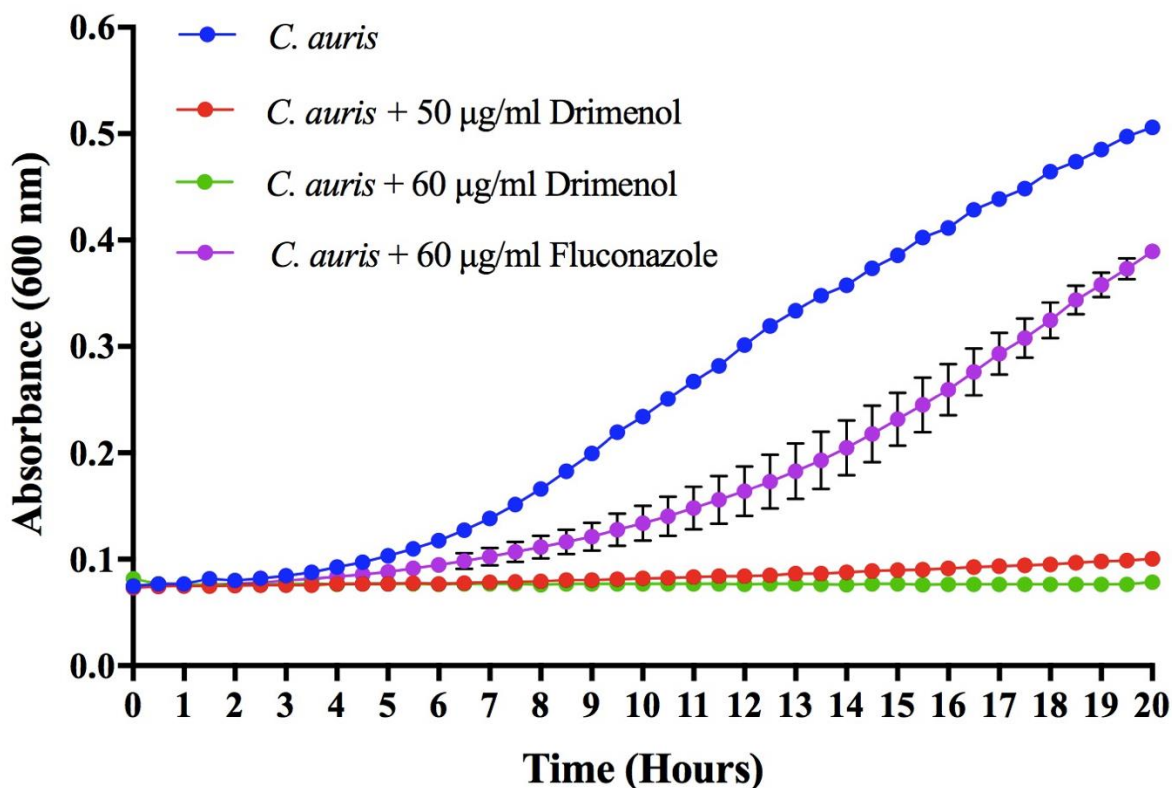

202  
203 **FIG. 4. Drimenol (1) inhibits *C. auris* growth better than fluconazole.** *C. auris* was grown in  
204 honeycomb microtiter wells containing RPMI medium in the presence and absence of **1** for 20 h

205 at 37° C. Fungus growth was measured by absorbance at OD 600 nm using Bioscreen-C growth  
206 monitor. Growth curves showed the mean of triplicates and experiments were repeated at least  
207 twice. Error bars are SD and were too short to appear in the line graphs.

208

### 209 **Drimenol (1) is tolerated by *C. elegans* and protects it from fungal mediated death**

210 Invertebrate animal models provide an inexpensive and powerful platform to test antifungal  
211 compounds for their efficacy and toxicity simultaneously. We evaluated **1** for its antifungal  
212 activity and tolerance in *C. elegans* infection model of candidiasis as described before (20).  
213 Results shown in **Fig. 5** indicate that **1** can protect worms from *C. albicans* mediated death and  
214 that the worms were not adversely affected by **1**, as judged by their motility and viability following  
215 compound exposure.

216

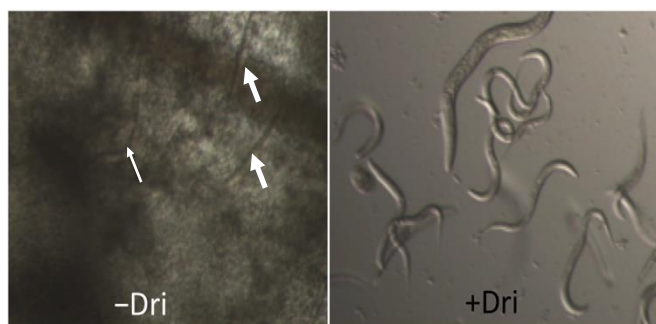

221

222 **FIG. 5. Protection of *Caenorhabditis elegans* worms from *C. albicans* mediated death by**  
223 **drimenol.** *C. albicans* (yeast cells) fed larvae were incubated in RPMI medium without and with  
224 **1** (+Dri) (50 µg/ml) in a 96 well microtiter plate and incubated at 30 °C for 2 – 3 days. Left panel  
225 without drimenol shows died worms (straight and immobile, thick arrows) due to *C. albicans*  
226 growth. Thin arrow shows a weakly moving worm. Right panel shows **1** containing well where  
227 worms are alive as judged by their movements and the lack of fungal growth.

228

## 229 **Mechanism of drimenol (1) antifungal activity**

230 To understand the compound's mechanisms of action (MOA), researchers have used pooled library  
231 of genome-wide barcoded mutant collections of *Saccharomyces cerevisiae* or *C. albicans* for drug-  
232 induced sensitivity assay or the haploinsufficiency (HIP) assay (21-23). For example, if **1** can  
233 inactivate partially or completely its protein target in the heterozygous mutant pool, the resulting  
234 growth defect of that mutant(s) can be measured quantitatively by sequencing the tagged unique  
235 barcodes. This approach will help narrowing down the putative target(s). Similarly, a  
236 homozygous nonessential mutant library can be used as a complementary approach to the  
237 heterozygous essential mutant collection to verify the target pathway/genes of compounds. In this  
238 case, if the homozygous mutant of a gene is sensitive to the compound, then that gene may not be  
239 the drug target (21) as the homozygous mutant lacks the gene product. This implies that the  
240 compound may exert its effect via drug-induced synthetic lethality. Thus, by combining data from  
241 both heterozygote and homozygote screens one may determine the compound's MOA.

242

243 In this study, we used *S. cerevisiae* barcoded homozygous nonessential and heterozygous essential,  
244 and *C. albicans* barcoded heterozygous Tn mutant (23) libraries. Briefly, IC-50 of **1** for *C.*  
245 *albicans* and *S. cerevisiae* was determined in yeast growth (YPD) condition (**Fig. 6**). Based on  
246 this assay results, IC-50 of 25 µg/ml for *C. albicans* and 15 µg/ml for *S. cerevisiae* was calculated  
247 for **1**. Two different sub-MIC concentrations of **1** were selected for determining the mechanism  
248 of action against mutant libraries.

249

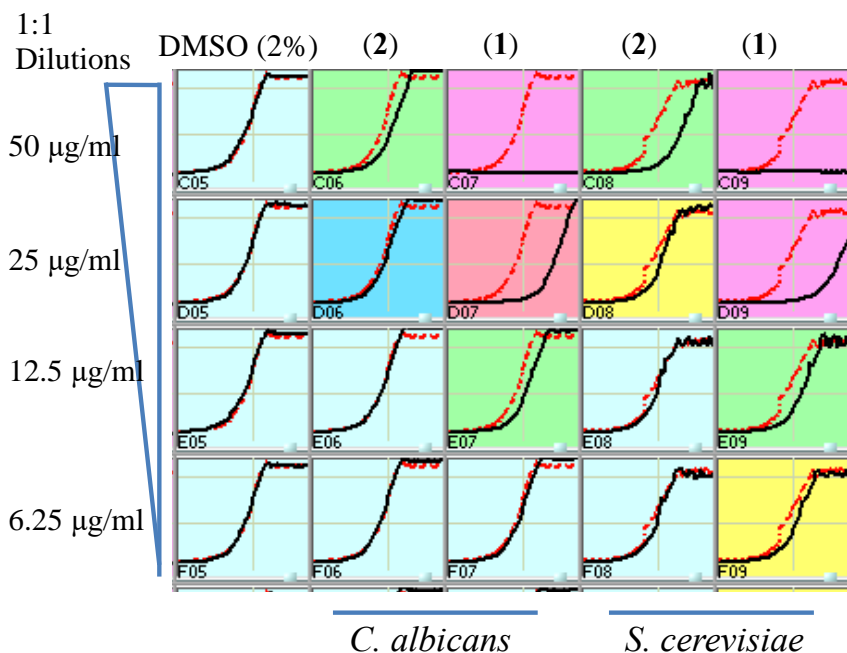

250

251 **FIG. 6. Determination of IC-50 for drimenol (1) activity against *C. albicans* and *S. cerevisiae*.**

252 Yeast growth conditions (YPD medium at 30°C) were used to determine the IC-50 values. The  
253 red line in each panel indicates growth of the DMSO reference. An IC-50 of ~25 µg/ml for *C.*  
254 *albicans* and ~15 µg/ml for *S. cerevisiae* were calculated for **1**. Albicanol (**2**) showed weaker  
255 activity against both fungi and was not considered for further analysis.

256

257 Next, pooled *S. cerevisiae* and *C. albicans* mutant collections were grown separately in the  
258 presence or absence of compounds (with DMSO) for 20-generations, barcodes from genomic DNA  
259 were amplified and relative strain abundance were quantified based on TAG microarray signals.  
260 The log<sub>2</sub> ratio of tag signals between DMSO control and **1** exposed samples were presented in  
261 scatter plots as the “fitness defect” (**Figs. 7A & B**). Mutants that were depleted from the growth  
262 pool due to **1** are indicated by circles. Mutants that were highly susceptible to **1** are shown with  
263 high log ratio (e.g. SEC66 in **Fig. 7A**) (highly depleted in the pool) and considered putative targets.



264 Lists of *S. cerevisiae* and *C. albicans* mutants that are highly sensitive to **1** were given in  
 265 **Supplementary Tables 1 and 2**, respectively.

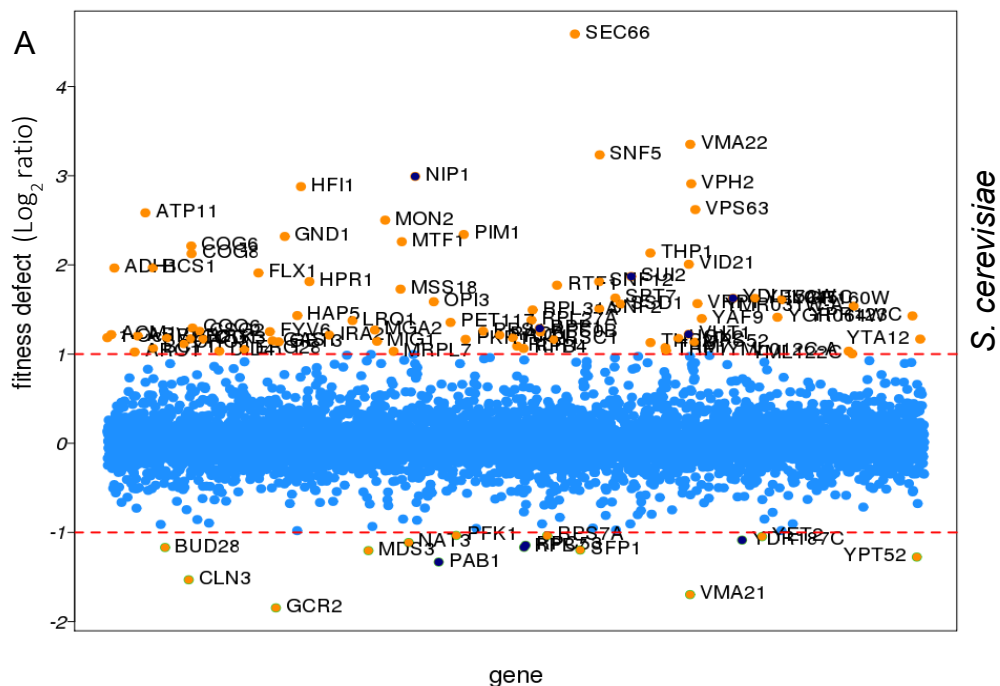

266

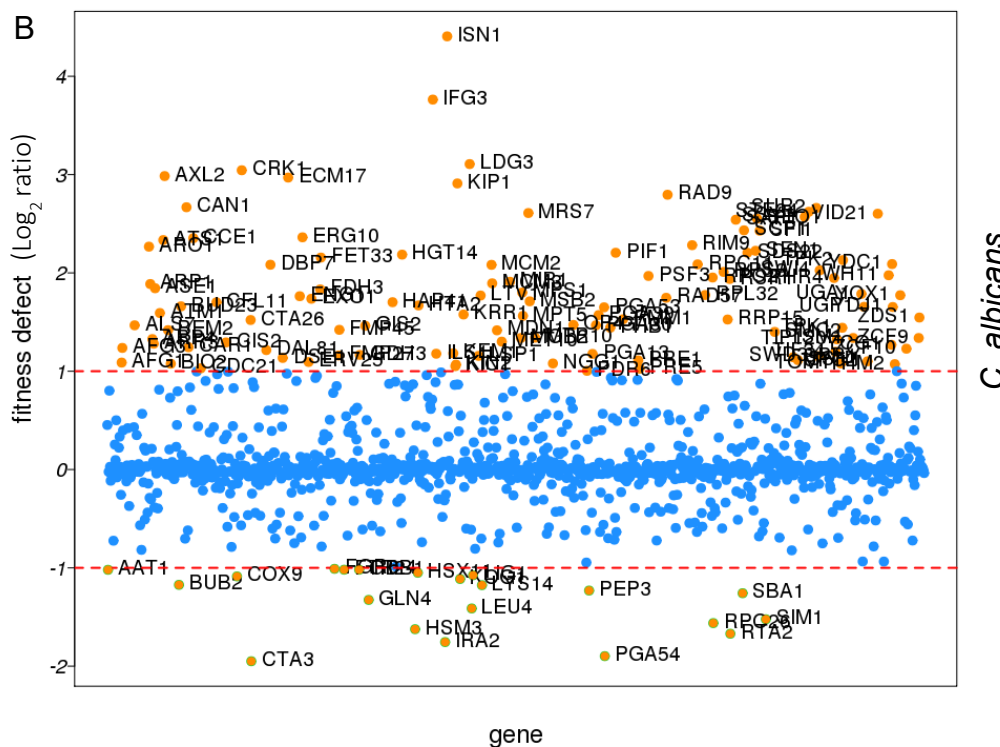

267



268 **FIG. 7. Genome-wide screens of *S. cerevisiae* (A) and *C. albicans* (B) mutant libraries against**  
269 **drimenol (1) for drug induced hypersensitivity.** Pooled collections of *S. cerevisiae* nonessential  
270 homozygous and essential heterozygous mutants were grown in the presence and absence of **1** at  
271 the concentration of 0.025 mg/ml for the indicated number of generations before profiling for their  
272 abundance (DNA barcodes). Twenty generations for essential heterozygous and five generations  
273 for non essential homozygous mutants were used which gave an optimum of ~20% growth  
274 inhibition. Similarly, *C. albicans* Tn-insertion mutants (heterozygous, 20 generations) was used  
275 at 0.025 mg/ml of **1**. Each spot represents single mutant. The log ratio of each mutant (**1** exposed  
276 vs no drug control) was calculated and presented in scatter plots where greater the number the  
277 more sensitive that strain is.

278  
279 Our results of forward genetic screening from mutant libraries of *C. albicans* and *S. cerevisiae*  
280 with **1** indicate that it affects cellular activities involved in protein secretion, vacuolar functions,  
281 chromatin remodeling and cyclin dependent protein kinases (CDK) (**Fig. 7** and **Supplementary**  
282 **Tables 1 & 2**). For example, SEC66, highly sensitive to **1** ( $\log_2 >4.5$ , **Fig. 7A**), is a component of  
283 Sec63 SECretary complex in *S. cerevisiae* involved in protein targeting and importing into the ER.  
284 Similarly, VMA22 is a vacuolar membrane ATPase required for vacuolar H<sup>+</sup>-ATPase function  
285 and localized to the yeast ER (Saccharomyces Genome Database).

286  
287 The *ISN1* ( $\log_2$  4.4, **Fig. 7B**) gene product is involved in inosine 5'-monophosphate 5'-  
288 nucleotidase activity in *C. albicans* (Candida Genome Database). This gene product is  
289 uncharacterized and it is present only in fungi and not in human or murine, suggesting that Isn1p  
290 a suitable antifungal drug target. *IFG3* is a putative D-amino acid oxidase, which is

291 uncharacterized, and *CRK1* is a protein kinase of the Cdc2 subfamily involved in hyphal  
292 development and virulence in *C. albicans* (24). The *CRK1* ortholog in *S. cerevisiae* is *SGVI*,  
293 which is a part of BUR2 kinase complex and plays a major role in transcriptional regulation.

294

### 295 Yeasts spot assay to validate drimenol (1) mechanism of action

296 Based on the forward genetic library screening assay results (**Fig. 7**) and their functions inferred  
297 from the available literature, we selected few heterozygous mutants of *C. albicans* that had high  
298 to medium positive log<sub>2</sub> ratio (hypersensitive, *CRK1* and its putative interacting partners proteins

299

300

301

302

303

304

305

306

307

308

309

310

311

312

313

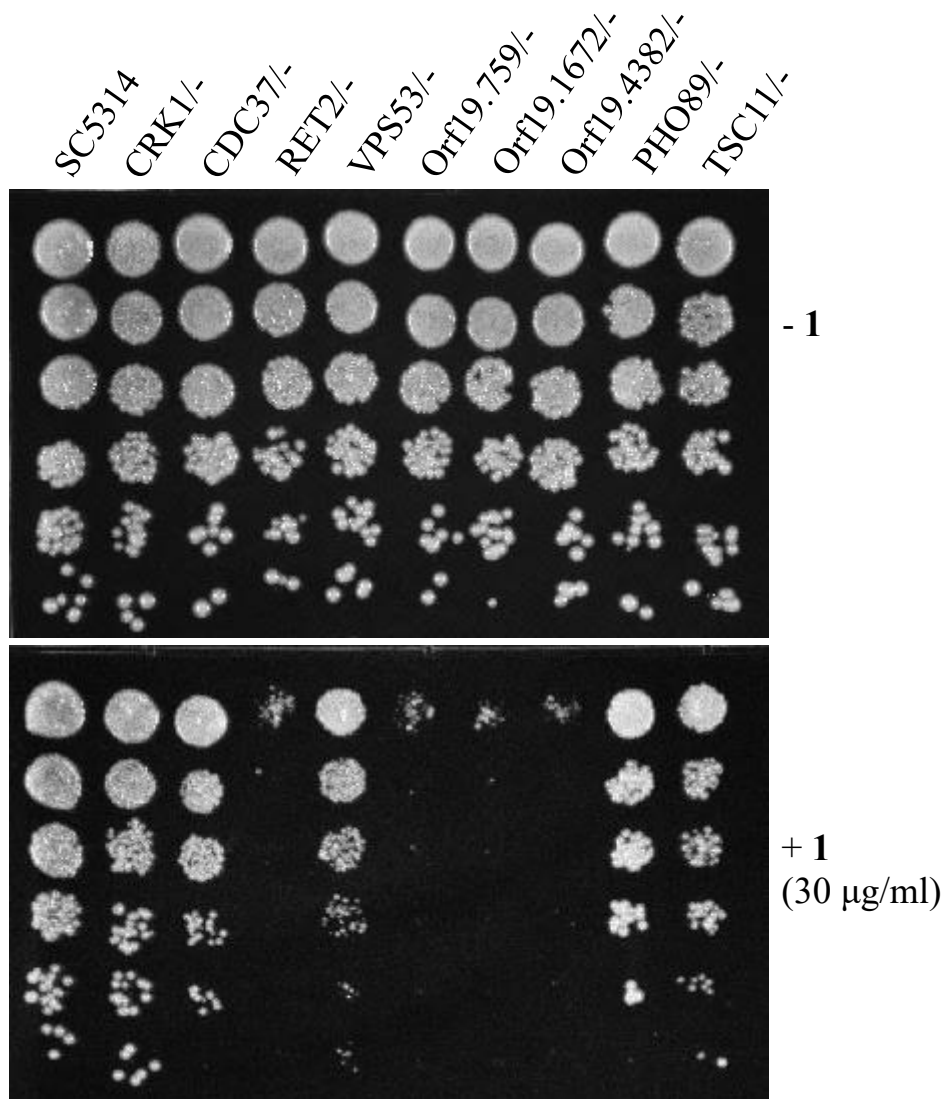

314 **FIG. 8. Validation of *C. albicans* Tn-insertion mutant screen data by yeast spot assay.** A four-  
315 fold serially diluted yeast cultures of indicated *C. albicans* heterozygous mutants (GRACE) were  
316 spot tested on YPD agar containing **1** (30 µg/ml) or DMSO (- **1**). Heterozygous mutants (*RET2*/  
317 *, Orf19.759*/-, *Orf19.1672*/*, and Orf19.4382*/*) affected by 1 directly or indirectly were*  
318 hypersensitive and showed lack of growth.

319  
320 *CDC37, Orf19.759, Orf19.1672 and Orf19.4382*) and few with negative log<sub>2</sub> ratio (resistance,  
321 *VPS53, TSC11 & PHO89*) to verify the genetic screening data. Agar medium containing sub-MIC  
322 concentration of **1** (30 µg/ml) or solvent was used to spot test suspensions of various mutants  
323 (GRACE mutant collection) (25).

324  
325 Results shown in **Fig. 8** confirm the findings of forward genetic screening assays of *C. albicans*  
326 mutants. For example, Crk1 Kinase is predicted to associate with *RET2*, which involves in  
327 retrogradation of vesicle transport for protein signaling and secretion (*SEC66*), and plays a role in  
328 protein translation with G1/S cell-cycle transition (26). Products encoded by *Ret2*, *orf19.759*  
329 (*SEC21*), *orf19.1672* (*COPI*) and *orf19.4382* (*RET3*) are uncharacterized and are likely targets of  
330 Crk1 kinase, which are defective in growth on agar medium containing **1** (**Fig. 8**). Molecule **1**  
331 induced hypersensitivity of these mutants, which represent candidate targets. The *orf19.759*  
332 (*SEC21* ortholog of *S. cerevisiae*) is uncharacterized in *C. albicans*. *Sec21* involves in transport  
333 from endoplasmic reticulum (ER) to Golgi vesicle-mediated transport (anterograde), Golgi to ER  
334 (retrograde) and COPI vesicle coat, and endosome localization (27). *RET2* is also uncharacterized  
335 in *C. albicans* and the ortholog is a subunit of the coatamer complex (COPI), which coats Golgi-  
336 derived transport vesicles, involves in retrograde transport between Golgi and ER, and interacts

337 with Crk1 kinase in the two-hybrid system (28). Crk1 is known to play a role in regulating  
338 trafficking and secretion of effectors by interacting with the early endosome during *Ustilago*  
339 *maydis* (corn smut fungus) infection in corn plants (29, 30).

340  
341 Since Crk1 kinase may interact with multiple targets (Ret2, orf19.759, orf19.1672 and orf19.4382)  
342 and because Crk1 represents an important antifungal drug target (24), we performed computational  
343 molecular docking of **1** with *Cryptosporidium parvum* Crk1 crystal structure (2QKR-A) (31) using  
344 AutoDock Vina software (32). Results showed in **Fig. 9**, suggest that **1** can interact with the N-  
345 terminal catalytic domain of *C. albicans* Crk1 (which has 61% similarity and 40% identical to the  
346 *C. parvum* Crk1). Particularly, noteworthy from our computational docking studies is that **1** has  
347 close interactions with Gly 31, Val 37, Gln 148, Leu 151, and Phe 98 amino acid residues. The  
348 docked structure shows that an available open space in Crk1 for incorporation of an additional  
349 function group onto the cyclohexane A ring of **1** (**Fig. 1**), signifying a possible modification of **1**  
350 for future improvement of biological activity. Thus, this CDK member may comprise the target  
351 of **1** and it is notable that this conserved gene is present in many of the tested pathogenic fungi  
352 (**Table 2**).

353  
354 **FIG. 9. Molecular docking of drimenol with *C. parvum* Crk1 kinase.**

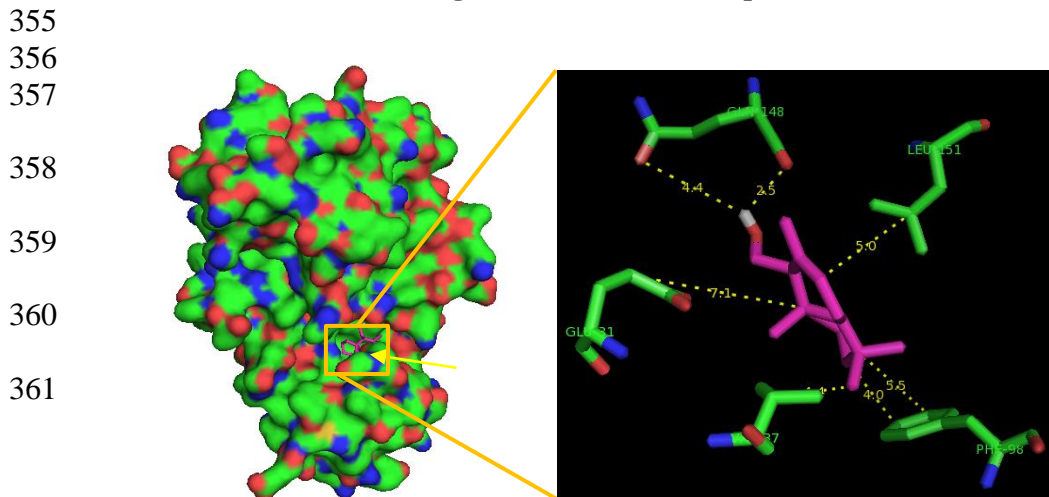

## 362 **DISCUSSION**

363 Fungi have emerged in the last two decades as major causes of human disease. *C. albicans* is a  
364 major fungal pathogen affecting at all ages and fourth leading cause of nosocomial bloodstream  
365 infections in the US (33). *C. albicans* and other *Candida* spp cause mucosal, disseminated and  
366 invasive candidiasis, especially among patients who are immunocompromised or hospitalized with  
367 serious underlying diseases. The overall mortality for invasive diseases caused by *Candida* spp.  
368 and *Aspergillus* spp. is around 50% (33, 34). While there are more than 150 species of *Candida*,  
369 about 15 species are recognized as frequent human pathogens (34, 35). Some of them are: *C.*  
370 *albicans*, *C. glabrata*, *C. krusei*, *C. tropicalis* and *C. parapsilosis*. Among these, *C. albicans* is by  
371 far the most common species isolated from humans and is a frequent denizen of the oropharynx,  
372 mucousal surfaces, gastrointestinal and genitourinary tracts. In the developing world, there are ~1  
373 million cases of cryptococcal diseases per year resulting in 675,000 deaths (9, 36). *Cryptococcus*  
374 *neoformans* is an opportunistic fungal pathogen that causes meningitis in immunocompromised  
375 individuals. Often found in soils contaminated with bird feces, *C. neoformans* enters its host  
376 through the lungs via inhalation of spores. Some of the cryptococcal species are hypervirulent  
377 (37) and have drawn a considerable public attention due to their causative role in the  
378 cryptococcosis outbreak throughout the Pacific Northwest (38, 39). Only few antifungals can be  
379 useful to treat cryptococcosis and drug resistant strains are emerging.

380

381 *Aspergillus* spp are ubiquitous molds found widely in the environment as saprophytes and produce  
382 microscopic spores or conidia which upon inhalation, cause invasive pulmonary disease. In  
383 immunocompromised patients such as hematopoietic stem cell transplantation, solid organ  
384 transplantation and undergoing chemotherapeutic agents or immunomodulatory agents, invasive

385 aspergillosis remains the most important cause of infection-related mortality (40, 41). Among  
386 several species of *Aspergillus*, *A. fumigatus* and *A. flavus* are frequent pathogens. Dermatophytes  
387 are another group of keratinophilic pathogenic fungi that causes variety of infections in humans  
388 and animals (42). Some of these fungi include *Trichophyton tonsurans* (scalp ring-worm), *T.*  
389 *equinum*, and *Microsporum gypseum* (gardener's ringworm). Emerging fungal disease such as  
390 zygomycosis is life-threatening particularly during natural calamity (*e.g.* the 2004 tsunami, the  
391 2008 Katrina and May-2011 Joplin tornado). Novel compounds with broad-spectrum antifungal  
392 activity are highly desirable to treat various fungal pathogens.

393  
394 Because fungi are eukaryotes, the development of antifungal therapeutics that are nontoxic to  
395 human is challenging due to the availability of relatively few targets. In the last thirty years, only  
396 one new class of antimycotic ( $\beta$ -glucan synthase inhibitor, the echinocandins) was introduced into  
397 clinical practice. Although this drug is an important addition, it has a number of limitations  
398 including ineffectiveness against *Cryptococcus sp* and poor oral bioavailability (43). New drugs  
399 are needed to be discovered and developed.

400  
401 In our search for novel antifungal small molecules from our available synthetic terpenoids, we  
402 have identified two compounds, (-)-drimenol (**1**) and (+)-albicanol (**2**) (**Fig. 1**), that showed strong  
403 activity against *C. albicans*. Among these two compounds, **1** showed stronger bioactivity. It acts  
404 not only against *C. albicans* as fungicidal but also against *Aspergillus nidulans*, FLU resistant  
405 strains of *C. albicans*, *C. glabrata*, *C. krusei*, *Cryptococcus spp* and other dermatophytes,  
406 suggesting that **1** is a broad-spectrum antifungal agent (**Figs. 2, 3** and **Table 2**). At an increased  
407 concentration (100  $\mu\text{g/ml}$ ), **1** caused rupturing of the fungal cell wall/membrane, *e.g.* *C. albicans*

408 **(Fig. 3)** and *Cryptococcus sp.* (data not included). *Candida auris* is an emerging and multi  
409 antifungal resistant strain that causes nosocomial infection and has been reported recently across  
410 the world (18). Our bioscreen-based growth curve monitoring assay with **1** showed better activity  
411 than clinical antifungal drug FLU (**Fig. 4**) indicating a potential use of **1** against *C. auris* and other  
412 drug-resistant fungal pathogens.

413  
414 Molecule **1** is a natural product presents in liverworts and higher plants (44, 45), and its antifungal  
415 mechanism against human pathogenic fungi has not been reported previously. A recent study has  
416 shown that **1** has antifungal activity against *Botrytis cinerea*, a plant fungal pathogen and the  
417 mechanisms appear to act by fungal membrane damage and reactive oxygen species (ROS)  
418 production (46).

419  
420 In order to develop broad-spectrum novel antifungal compounds, we evaluated **1** against various  
421 fungi that are pathogenic to humans and determined its mechanisms of action in *C. albicans* and  
422 *S. cerevisiae*. Based on our yeasts mutant screening data and subsequent spot assay results, we  
423 found that **1** acts as a fungicidal compound by affecting cellular activities targeting protein  
424 trafficking between Golgi to ER, protein secretion (Sec system) and cell signaling, possibly  
425 through cell division related kinase 1, Crk1 (**Figs. 7 & 8**). Genetic methods have been used to  
426 determine the mechanism of antifungal compounds by drug-induced hypersensitivity assay (22,  
427 47). Using similar approaches, we showed that **1**-mediated inhibition of *C. albicans* heterozygous  
428 mutants of *CDC37*, *Orf19.759*, *Orf19.1672* and *Orf19.4382*, the known or putative targets of Crk1  
429 kinase, at sub-MIC concentration. In support of this observation, computational molecular  
430 docking of **1** with the crystal structure of a fungal (*C. parvum*) Crk1 kinase showed interactions of



431 **1** with the key residues in the catalytic domain (*N*-terminal) of Crk1 (**Fig. 9**).

432

433 Cinnamodial is a closely related compound belong to the drimane sesquiterpenoid family with  
434 potent antifungal activity (48), but its chemical structure (containing dialdehyde groups; **Fig. 1**)  
435 and physiological properties are quite different from **1**. For example, the antifungal activity of  
436 cinnamodial was shown to abolish by amine compounds (likely due to a coupling reaction from  
437 the aldehyde functions of cinnamodial with the amino group of amine compounds) or when  
438 cinnamodial was incubated in YPD medium (19, 49). In contrast, molecule **1**'s bioactivity was  
439 not affected by amines or YPD medium (**Fig. 5**). Thus, the antifungal mechanisms of **1** could be  
440 different from cinnamodial. Since the synthetic route for **1** and its analogs are well established,  
441 improvements of its antifungal properties are possible through medicinal chemistry approaches.  
442 In summary, we have synthesized a focused library of drimane sesquiterpenoid compounds and  
443 identified **1** as a broad-spectrum fungicidal compound against various human pathogenic fungi  
444 including *C. albicans*, *C. auris*, *Cryp. neoformans*, *Aspergillus*, *Blastomyces*, *Scedosporium*,  
445 *Fusarium*, *Pneumocystis*, and dermatophytes at 8 - 64 µg/ml. By employing the libraries of bar-  
446 coded *C. albicans* and *S. cerevisiae* genome-wide mutants, the mechanism of action of **1** was  
447 determined. Further evaluation of **1** in animal models of fungal diseases would help develop **1** as  
448 an antifungal agent.

449

## 450 MATERIALS AND METHODS

451

452 **Synthesis of drimane molecules. (1R,2R,4aS,8aS)-2-Hydroxy-2,5,5,8a-tetramethyl-**  
453 **decahydronaphthalene-1-carbaldehyde (4).** To a solution of 0.20 g (0.74 mmol) of triol **3** (13)



454 in 10 ml of THF and 2.5 ml of water was added 0.19 g (0.81 mmol) of potassium periodate. The  
455 resulting mixture was stirred at 25°C for 4 hours, diluted with water (50 ml) and extracted three  
456 times with ethyl acetate (50 ml each). The combined extract was washed with water and brine,  
457 dried (anhydrous Na<sub>2</sub>SO<sub>4</sub>), concentrated, and column chromatographed on silica gel using a  
458 mixture of hexane and ethyl acetate (20:1) as an eluent to give 0.16 g (91% yield) of compound **4**,  
459 whose spectral data is in agreement with that reported (13).

460 **(1S,2R,4aS,8aS)-1-(Hydroxymethyl)-2,5,5,8a-tetramethyl-decahydronaphthalen-2-ol (5)**. To  
461 a cold (0°C) solution of 1.0 g (4.2 mmol) of aldehyde **4** in 80 mL of diethyl ether under argon, 80  
462 mg (2.1 mmol) of lithium aluminum hydride was added in portions. The resulting solution was  
463 stirred at 0°C for 30 minutes, diluted with aqueous NH<sub>4</sub>Cl, and extracted with diethyl ether three  
464 times (50 ml each). The combined extract was washed with water and brine, dried (MgSO<sub>4</sub>), and  
465 concentrated to give 0.98 g (97% yield) of diol **5**, whose spectral data are in agreement with that  
466 reported (13).

467 **[(1S,2R,4aS,8aS)-2-Hydroxy-2,5,5,8a-tetramethyl-decahydronaphthalen-1-yl]methyl**  
468 **acetate (6)**. To a cold (0°C) solution of 0.10 g (0.40 mmol) of diol **5** in 2 ml of dichloromethane  
469 and 0.32 g (4.0 mmol) of pyridine under argon, was added 49 µl (0.48 mmol) of acetic anhydride,  
470 and the resulting solution was stirred at 0°C for 30 minutes and 25°C for 1 h. It was diluted with  
471 30 ml of aqueous NH<sub>4</sub>OH, extracted twice with diethyl ether (30 ml each), and the combined  
472 extracts were washed with water and brine, dried (anhydrous Na<sub>2</sub>SO<sub>4</sub>), concentrated, and column  
473 chromatographed on silica gel using a gradient mixture of hexane and diethyl ether as eluents to  
474 give 90 mg (80% yield) of acetate **6**. Mp. 64 – 67 °C; [ $\alpha$ ]<sub>D</sub><sup>22</sup> = -8.2 (c = 0.55, CHCl<sub>3</sub>); <sup>1</sup>H NMR  
475 (CDCl<sub>3</sub>; 400 MHz)  $\delta$  4.35 (dd, *J* = 12, 4 Hz, 1 H), 4.24 (dd, *J* = 12, 4 Hz, 1 H), 2.05 (s, 3 H), 1.88  
476 (dt, *J* = 12, 2 Hz, 1 H), 1.70 – 0.93 (a series of m, 11 H), 1.17 (s, 3 H), 0.88 (s, 3 H), 0.86 (s, 3 H),

477 0.80 (s, 3 H) ppm;  $^{13}\text{C}$  NMR ( $\text{CDCl}_3$ ; 100 MHz)  $\delta$  171.4, 72.6, 62.6, 60.0, 55.7, 44.0, 41.7, 39.7,  
478 38.1, 33.5, 33.2, 24.6, 21.6, 21.3, 20.3, 18.4, 15.8 ppm. MS (electrospray ionization),  $m/z$  283.1  
479 ( $\text{M}+\text{H}^+$ ). HRMS-ESI:  $m/z$   $[\text{M} + \text{H}]^+$  calcd for  $\text{C}_{17}\text{H}_{31}\text{O}_3^+$ : 283.2268, found: 283.2273.

480 **(1*S*,2*R*,4*aS*,8*aS*)-1-(Hydroxymethyl)-2,5,5,8*a*-tetramethyl-decahydronaphthalen-2-yl**

481 **acetate (7)**. Compound **7** was prepared by a sequence of three reactions: (i) silylation of the  
482 primary alcohol function of **5** with *t*-butyldimethylsilyl chloride; (ii) acetylation of the tertiary  
483 alcohol function with acetyl chloride and pyridine; and (iii) removal of the *t*-butyldimethylsilyl  
484 ether protecting group with tetra-*n*-butylammonium fluoride in THF.

485 To a solution of 9.5 mg (40  $\mu\text{mol}$ ) of compound **5**, 11 mg (150  $\mu\text{mol}$ ) of imidazole, and 6 mg (49  
486  $\mu\text{mol}$ ) of 4-(dimethylamino)pyridine in 2 ml of dichloromethane under argon at 25°C, was added  
487 14.3 mg (95  $\mu\text{mol}$ ) of *t*-butyldimethylsilyl chloride, and the solution was stirred for 4 h. The  
488 reaction mixture was diluted with 10 ml of aqueous ammonium chloride and extracted with diethyl  
489 ether three times (10 ml each). The combined extracts were washed with water (10 ml) and brine  
490 (10 ml), dried (anhydrous  $\text{Na}_2\text{SO}_4$ ), concentrated to give 12.5 mg of the mono-silylated product.

491 This crude product was used in the subsequent step without purification. To a solution of the  
492 above mono-silylated product and 0.1 ml of pyridine in 0.5 ml of dichloromethane under argon at  
493 0°C, was added 10  $\mu\text{l}$  (0.13 mmol) of acetyl chloride. The reaction mixture was stirred at 25°C for  
494 2 h, diluted with aqueous ammonium chloride (10 ml), and extracted three times with diethyl ether  
495 (10 ml each). The combined extracts were washed with brine, dried (anhydrous  $\text{Na}_2\text{SO}_4$ ),  
496 concentrated to give the crude product, which was used in the following step without purification.

497 The above crude product was dissolved in 1 ml of dried THF (distilled over sodium/benzophenone)  
498 and 0.3 ml (0.3 mmol) of tetra-*n*-butylammonium fluoride (1 M solution in THF) and stirred at  
499 25°C under argon for 1 h. The reaction solution was diluted with 0.1 N ammonium hydroxide (10

500 ml) and extracted with diethyl ether three times (10 ml each). The combined extracts were washed  
501 with water (10 ml) and brine (10 ml), dried (anhydrous Na<sub>2</sub>SO<sub>4</sub>), concentrated, and column  
502 chromatographed on silica gel using a gradient mixture of hexane and diethyl ether to give 4.2 mg  
503 (38% overall yield from diol **5**) of compound **7**. Compound **7**: Mp. 101 – 103 °C; [ $\alpha$ ]<sub>D</sub><sup>22</sup> = +0.35  
504 (c = 0.23, CHCl<sub>3</sub>); <sup>1</sup>H NMR (CDCl<sub>3</sub>; 400 MHz)  $\delta$  3.91 (dd, *J* = 12, 2 Hz, 1 H), 3.84 (dd, *J* = 12, 2  
505 Hz, 1 H), 2.95 – 2.90 (m, 1 H), 1.98 (s, 3 H), 1.88 (dt, *J* = 12, 2 Hz, 1 H), 1.62 (s, 3 H), 1.70 – 0.88  
506 (a series of m, 10 H), 0.94 (s, 3 H), 0.87 (s, 3 H), 0.82 (s, 3 H) ppm; <sup>13</sup>C NMR (CDCl<sub>3</sub>; 100 MHz)  
507  $\delta$  169.9, 84.9, 63.8, 59.8, 55.8, 41.8, 39.5, 38.2, 36.1, 33.5, 33.2, 25.8, 22.8, 21.7, 18.3 (2 C), 16.1  
508 ppm. MS (electrospray ionization), *m/z* 305.1 (M+Na<sup>+</sup>). HRMS-ESI: *m/z* [M + Na]<sup>+</sup> calcd for  
509 C<sub>17</sub>H<sub>30</sub>NaO<sub>3</sub><sup>+</sup>: 305.2087, found: 305.2082.

510 **(1*S*,2*R*,4*aS*,8*aS*)-1-(2,2-Dimethyl-1,3-dioxolan-4-yl)-2,5,5,8*a*-tetramethyl-**

511 **decahydronaphthalen-2-ol (8)**. A solution of 18 mg (67  $\mu$ mol) of triol **3**, 50  $\mu$ l of 2,2-  
512 dimethoxypropane and 3 mg of anhydrous *p*-toluenesulfonic acid in 1 ml of toluene was stirred  
513 under argon at 55°C for 1 h. The solution was cooled to room temperature, neutralized with sodium  
514 bicarbonate (~3 mg), diluted with 10 ml of water, and extracted with ethyl acetate three times (15  
515 ml each). The combined extract was washed with brine, dried (MgSO<sub>4</sub>), concentrated and column  
516 chromatographed on silica gel using a gradient mixture of hexane and diethyl ether as eluent to  
517 give 14 mg (71% yield) of compound **8** as a mixture of two stereoisomers: (the major isomer was  
518 partially purified and reported) Mp. 114 – 117 °C; [ $\alpha$ ]<sub>D</sub><sup>22</sup> = -25.1 (c = 1.0, CHCl<sub>3</sub>); <sup>1</sup>H NMR  
519 (CDCl<sub>3</sub>; 400 MHz)  $\delta$  4.96 (s, 1 H, OH), 4.24 – 4.20 (m, 2 H), 3.59 (td, *J* = 8, 4 Hz, 1 H), 1.84 (dt,  
520 *J* = 12, 2 Hz, 1 H), 1.70 – 0.83 (a series of m, 11 H), 1.45 (s, 3 H), 1.41 (s, 6 H, 2 CH<sub>3</sub>), 0.97 (s, 3  
521 H), 0.90 (s, 3 H), 0.83 (s, 3 H) ppm; <sup>13</sup>C NMR (CDCl<sub>3</sub>; 100 MHz)  $\delta$  107.4, 73.5, 72.8, 62.2, 55.7,  
522 42.8, 41.5, 40.4, 37.3, 33.6, 33.3, 26.5, 26.2, 25.8, 21.7, 19.7, 18.4 (2 C), 16.1 ppm. MS

523 (electrospray ionization), m/z 333.1 (M+Na<sup>+</sup>). HRMS-ESI: m/z [M + Na]<sup>+</sup> calcd for C<sub>19</sub>H<sub>34</sub>NaO<sub>3</sub><sup>+</sup>:  
524 333.2406, found: 333.2411.

525

## 526 **Determination of Antifungal activity of synthetic compounds**

527 Synthetic pure drimenol or albicanol was dissolved in DMSO (10 mg/ml as stock solution) and  
528 used for determining their antifungal activities (minimum inhibitory concentration, MIC) against  
529 various fungi according to the microdilution assay of CLSI (17). The CLSI broth dilution methods  
530 of M27-A3 for yeasts and M38-A for filamentous fungi were used to determine the susceptibility.  
531 Since our initial assay with *C. albicans* confirmed the antifungal activity of drimenol and albicanol,  
532 we extended the susceptibility assay to other pathogenic fungi including FLU resistant *C. albicans*,  
533 various species of candida, *Cryptococcus*, *Aspergillus* and a dermatophyte fungus (strains were  
534 generously provided by Dr. Ted C. White at The University of Missouri Kansas City (UMKC). *C.*  
535 *auris* was obtained from Dr. Baha Abdalhamid at The University of Nebraska Medical Center,  
536 Omaha NE). Briefly, yeast cells or conidia (for filamentous fungi) were suspended in RPMI 1640  
537 medium to a final concentration of 10<sup>5</sup> cfu/ml and distributed in 96-well microplate to a total  
538 volume of 100 µl/well. Drimenol or albicanol was added into the wells and a two-fold serial  
539 dilution was made. Duplicates were used for each concentration and wells with or without DMSO  
540 served as controls. Plates were incubated without shaking at 37°C for 24 - 48h for yeasts and 30°C  
541 for 4 days for filamentous fungi (*Aspergillus* sp and *Trichophyton* sp). The MIC was defined as  
542 the lowest compound concentration at which no growth occurred, as determined visually and  
543 microscopically (inverted microscope).

544

## 545 **Determination of *C. auris* growth inhibition by drimenol**

546 The effect of drimenol on the growth of *C. auris* was determined by Bioscreen-C real time growth  
547 monitoring system (Oy Growth Curves Ab Ltd, Finland) as described earlier (50). Briefly, 200  $\mu$ l  
548 of RPMI medium containing exponentially growing *C. auris* yeast cells (each at 0.07 OD<sub>600</sub>)  
549 were added into the honeycomb wells with or without compound (control) and measured their  
550 growth rates for 20 hours at 37°C. Compound treatment was done at two different concentrations  
551 for drimenol (50 and 60  $\mu$ g/ml). The absorbance was measured at 600 nm at 30 min intervals for  
552 24 h at 37°C with shaking for 10 s before each reading. Solvent negative control (DMSO) and  
553 FLU (60  $\mu$ g/ml; antifungal drug) positive control were included in the study. The experiments  
554 were repeated at least two times with three technical replicates.

555

#### 556 **Yeast spot assay**

557 Yeast Peptone Dextrose (YPD) agar containing a sub-MIC concentration of drimenol (30  $\mu$ g/ml)  
558 or an equal volume of DMSO was used to spot test the *C. albicans* heterozygous mutants (GRACE  
559 library (25)). Yeast suspensions of various mutants and the wild type *C. albicans* were used. Five  
560  $\mu$ l of a four-fold serially diluted suspension was spotted on the agar plates and incubated at 30°C  
561 for yeast growth for 24 h, and photographed. Experiments were repeated at least three times and  
562 a representative result was shown.

563

#### 564 **Genome-wide fitness assay**

565 The *Saccharomyces* yeast deletion collection was comprised of approximately 5,900 individually  
566 bar-coded heterozygous diploid strains (HIP [haploinsufficiency profiling]) and ~4,800  
567 homozygous diploid strains (HOP [homozygous deletion profiling]). Pools of approximately  
568 equal strain abundance were generated by robotically pinning (S and P Robotics, Ontario, Canada)

569 each strain (from frozen stocks) onto YPD agar plates as arrays of 384 strains/plate (21, 51, 52).  
570 After 2 days of growth at 30°C, colonies were collected from plates by flooding with YPD, and  
571 cells were adjusted to an optical density at 600 nm (OD<sub>600</sub>) of 2. The fitness of each strain in each  
572 experimental pool was assessed as described previously (21). The dose that resulted in 15%  
573 growth inhibition in *S. cerevisiae* BY4743 (the parent strain of the yeast deletion collection) was  
574 determined by analyzing dose response over the course of 16 h of growth at 30°C. Screens of the  
575 homozygous deletion collection were performed for 5 generations of growth and screens of the  
576 heterozygous deletion collection were collected after 20 generations of growth. Cells were  
577 processed as described previously (21). Genomic DNA was extracted from each sample and  
578 subjected to PCR to amplify the unique bar code identifiers. The abundance of each bar code was  
579 determined by quantifying the microarray signal as previously described (21).

580 *Candida albicans* pooled screens used the tn-transposon collection (23). Growth assays were  
581 performed in duplicate and samples were recovered at 20 generations of growth. Genomic DNA  
582 extraction, tag amplification, and hybridization were performed as described above.

583

584 **Conflict of interest:** A US patent (US 8,980,951 B2) on synthetic drimenol was approved in 2015  
585 to Kansas State University Research Foundation (KSURF) with authors GV and DHH.

586

587 **Supplementary data.**

588 Supplementary Table 1. *S. cerevisiae* genetic screening data

589 Supplementary Table 2. *C. albicans* genetic screening data

590

591 **Acknowledgement.** We thank Ted C. White, University of Missouri Kansas City (UMKC),  
592 Division of Cell Biology and Biophysics, Kansas City for various species of candida including  
593 fluconazole-resistant strains, *Cryptococcus*, *Aspergillus* and dermatophytes. Our sincere thanks to  
594 Terry Roemer, Merck Sharp and Dohme Corp, NJ for providing *C. albicans* GRACE and DBC  
595 mutant libraries. *C. auris* was obtained from Baha Abdalhamid, University of Nebraska Medical  
596 Center, Omaha NE. Kansas State University has utilized the non-clinical and pre-clinical service  
597 program offered by the National Institute of Allergy and Infectious Diseases at the Fungus Testing  
598 Laboratory, UTHSC San Antonio. Our sincere thanks to Nathan Wiederhold, Hoja Patterson, and  
599 April Torres for their assistance in testing drimenol for antifungal activity through the NIH service  
600 program. We thank Johnson Cancer Research Center, KSU for Innovative Research Award and  
601 Kansas Idea Network of Biomedical Research Excellence (K-INBRE) for CORE Facility support  
602 award to GV. CN is a CRC Tier 1 Chair in Translational Genomics and support for GG and CN  
603 is provided by the CIHR. Research reported in this publication was, in part, supported by the  
604 National Institute of General Medical Sciences of the National Institutes of Health under award  
605 number NIH R01GM128659 (to DHH). The content is solely the responsibility of the authors and  
606 does not necessarily represent the official views of the National Institutes of Health. This material  
607 was based upon work in part supported by the National Science Foundation under 1826982 (to  
608 DHH) for the purchase of a 400-MHz NMR spectrometer.

609

610

611

612

613

614 **References**

- 615 1. Fuentefria AM, Pippi B, Dalla Lana DF, Donato KK, de Andrade SF. 2018. Antifungals  
616 discovery: an insight into new strategies to combat antifungal resistance. *Lett Appl*  
617 *Microbiol* 66:2-13.
- 618 2. Perfect JR. 2017. The antifungal pipeline: a reality check. *Nat Rev Drug Discov* 16:603-  
619 616.
- 620 3. Perlin DS, Rautemaa-Richardson R, Alastruey-Izquierdo A. 2017. The global problem of  
621 antifungal resistance: prevalence, mechanisms, and management. *Lancet Infect Dis*  
622 17:e383-e392.
- 623 4. Nami S, Aghebati-Maleki A, Morovati H, Aghebati-Maleki L. 2019. Current antifungal  
624 drugs and immunotherapeutic approaches as promising strategies to treatment of fungal  
625 diseases. *Biomed Pharmacother* 110:857-868.
- 626 5. Nett JE, Andes DR. 2016. Antifungal Agents: Spectrum of Activity, Pharmacology, and  
627 Clinical Indications. *Infect Dis Clin North Am* 30:51-83.
- 628 6. Waldorf AR, Polak A. 1983. Mechanisms of action of 5-fluorocytosine. *Antimicrob Agents*  
629 *Chemother* 23:79-85.
- 630 7. Denning DW. 2002. Echinocandins: a new class of antifungal. *J Antimicrob Chemother*  
631 49:889-91.
- 632 8. Roemer T, Krysan DJ. 2014. Antifungal drug development: challenges, unmet clinical  
633 needs, and new approaches. *Cold Spring Harb Perspect Med* 4:pii: 4/5/a019703. doi:  
634 10.1101/cshperspect.a019703.
- 635 9. Denning DW, Hope WW. 2010. Therapy for fungal diseases: opportunities and priorities.  
636 *Trends Microbiol* 18:195-204.



- 637 10. Pfaller MA, Diekema DJ. 2007. Epidemiology of invasive candidiasis: a persistent public  
638 health problem. *Clin Microbiol Rev* 20:133-63.
- 639 11. Marie C, White TC. 2009. Genetic Basis of Antifungal Drug Resistance. *Curr Fungal Infect*  
640 *Rep* 3:163-169.
- 641 12. Sanglard D, Coste A, Ferrari S. 2009. Antifungal drug resistance mechanisms in fungal  
642 pathogens from the perspective of transcriptional gene regulation. *FEMS Yeast Res*  
643 9:1029-50.
- 644 13. Hua DH, Huang X, Chen Y, Battina SK, Tamura M, Noh SK, Koo SI, Namatame I,  
645 Tomoda H, Perchellet EM, Perchellet JP. 2004. Total syntheses of (+)-chloropuupehenone  
646 and (+)-chloropuupehenol and their analogues and evaluation of their bioactivities. *J Org*  
647 *Chem* 69:6065-78.
- 648 14. Madikane VE, Bhakta S, Russell AJ, Campbell WE, Claridge TD, Elisha BG, Davies SG,  
649 Smith P, Sim E. 2007. Inhibition of mycobacterial arylamine N-acetyltransferase  
650 contributes to anti-mycobacterial activity of *Warburgia salutaris*. *Bioorg Med Chem*  
651 15:3579-86.
- 652 15. Cortes M, Delgado V, Saitz C, Armstrong V. 2011. Drimenol: A versatile synthon for  
653 compounds with trans-drimane skeleton. *Nat Prod Commun* 6:477-90.
- 654 16. Liu Y, Liu Z, Cao X, Liu X, He H, Yang Y. 2011. Design and synthesis of pyridine-  
655 substituted itraconazole analogues with improved antifungal activities, water solubility and  
656 bioavailability. *Bioorg Med Chem Lett* 21:4779-83.
- 657 17. CLSI. 2008. Reference method for broth dilution antifungal susceptibility testing of yeasts  
658 and filamentous fungi; Approved Standard-Third Edition. Clinical and Laboratory

- 659 Standards Institute, 940 West Valley Road, Wayne, Pa. CLSI document M27-A3 & M38-  
660 A 28.
- 661 18. Kean R, Ramage G. 2019. Combined Antifungal Resistance and Biofilm Tolerance: the  
662 Global Threat of *Candida auris*. mSphere 4:DOI: 10.1128/mSphere.00458-19.
- 663 19. de Jong AW, Hagen F. 2019. Attack, Defend and Persist: How the Fungal Pathogen  
664 *Candida auris* was Able to Emerge Globally in Healthcare Environments. Mycopathologia  
665 184:353-365.
- 666 20. Vedyappan G, Dumontet V, Pelissier F, d'Enfert C. 2013. Gymnemic acids inhibit hyphal  
667 growth and virulence in *Candida albicans*. PLoS One 8:e74189.
- 668 21. Pierce SE, Davis RW, Nislow C, Giaever G. 2007. Genome-wide analysis of barcoded  
669 *Saccharomyces cerevisiae* gene-deletion mutants in pooled cultures. Nat Protoc 2:2958-  
670 74.
- 671 22. Xu D, Jiang B, Ketela T, Lemieux S, Veillette K, Martel N, Davison J, Sillaots S, Trosok  
672 S, Bachewich C, Bussey H, Youngman P, Roemer T. 2007. Genome-wide fitness test and  
673 mechanism-of-action studies of inhibitory compounds in *Candida albicans*. PLoS Pathog  
674 3:e92.
- 675 23. Oh J, Fung E, Schlecht U, Davis RW, Giaever G, St Onge RP, Deutschbauer A, Nislow C.  
676 2010. Gene annotation and drug target discovery in *Candida albicans* with a tagged  
677 transposon mutant collection. PLoS Pathog 6:e1001140.
- 678 24. Chen J, Zhou S, Wang Q, Chen X, Pan T, Liu H. 2000. Crk1, a novel Cdc2-related protein  
679 kinase, is required for hyphal development and virulence in *Candida albicans*. Mol Cell  
680 Biol 20:8696-708.

- 681 25. Roemer T, Jiang B, Davison J, Ketela T, Veillette K, Breton A, Tandia F, Linteau A,  
682 Sillaots S, Marta C, Martel N, Veronneau S, Lemieux S, Kauffman S, Becker J, Storms R,  
683 Boone C, Bussey H. 2003. Large-scale essential gene identification in *Candida albicans*  
684 and applications to antifungal drug discovery. *Mol Microbiol* 50:167-81.
- 685 26. An T, Liu Y, Gourguechon S, Wang CC, Li Z. 2018. CDK Phosphorylation of Translation  
686 Initiation Factors Couples Protein Translation with Cell-Cycle Transition. *Cell Rep*  
687 25:3204-3214 e5.
- 688 27. CGD. 2019. Candida Genome Database, [http://www.candidagenome.org/cgi-](http://www.candidagenome.org/cgi-bin/locus.pl?locus=Sec21&organism=C_albicans_SC5314)  
689 [bin/locus.pl?locus=Sec21&organism=C\\_albicans\\_SC5314](http://www.candidagenome.org/cgi-bin/locus.pl?locus=Sec21&organism=C_albicans_SC5314).
- 690 28. CGD. 2019. Candida Genome Database, ( [http://www.candidagenome.org/cgi-](http://www.candidagenome.org/cgi-bin/locus.pl?locus=ret2&organism=C_albicans_SC5314)  
691 [bin/locus.pl?locus=ret2&organism=C\\_albicans\\_SC5314](http://www.candidagenome.org/cgi-bin/locus.pl?locus=ret2&organism=C_albicans_SC5314)).
- 692 29. Higuchi Y. 2015. Initial fungal effector production is mediated by early endosome motility.  
693 *Commun Integr Biol* 8:e1025187.
- 694 30. Bielska E, Higuchi Y, Schuster M, Steinberg N, Kilaru S, Talbot NJ, Steinberg G. 2014.  
695 Long-distance endosome trafficking drives fungal effector production during plant  
696 infection. *Nat Commun* 5:5097.
- 697 31. Wernimont AK, Dong A, Lew J, Lin YH, Hassanali A, Arrowsmith CH, Edwards AM,  
698 Weigelt J, Sundstrom M, Bochkarev A, Hui R, Artz JD, (Structural Genomics  
699 Consortium). 2007. *Cryptosporidium parvum* cyclin-dependent kinase cgd5\_2510 with  
700 indirubin 3'-monoxime bound. <https://www.rcsb.org/structure/2qkr> (database release).
- 701 32. Trott O, Olson AJ. 2010. AutoDock Vina: improving the speed and accuracy of docking  
702 with a new scoring function, efficient optimization, and multithreading. *J Comput Chem*  
703 31:455-61.

- 704 33. Pfaller MA, Diekema DJ. 2010. Epidemiology of invasive mycoses in North America. Crit  
705 Rev Microbiol 36:1-53.
- 706 34. Pappas PG. 2006. Invasive candidiasis. Infect Dis Clin North Am 20:485-506.
- 707 35. Pfaller MA, Diekema DJ, Rinaldi MG, Barnes R, Hu B, Veselov AV, Tiraboschi N, Nagy  
708 E, Gibbs DL. 2005. Results from the ARTEMIS DISK Global Antifungal Surveillance  
709 Study: a 6.5-year analysis of susceptibilities of *Candida* and other yeast species to  
710 fluconazole and voriconazole by standardized disk diffusion testing. J Clin Microbiol  
711 43:5848-59.
- 712 36. Park BJ, Wannemuehler KA, Marston BJ, Govender N, Pappas PG, Chiller TM. 2009.  
713 Estimation of the current global burden of cryptococcal meningitis among persons living  
714 with HIV/AIDS. AIDS 23:525-30.
- 715 37. Byrnes EJ, 3rd, Li W, Lewit Y, Ma H, Voelz K, Ren P, Carter DA, Chaturvedi V, Bildfell  
716 RJ, May RC, Heitman J. 2010. Emergence and pathogenicity of highly virulent  
717 *Cryptococcus gattii* genotypes in the northwest United States. PLoS Pathog 6:e1000850.
- 718 38. Kidd SE, Hagen F, Tschärke RL, Huynh M, Bartlett KH, Fyfe M, Macdougall L, Boekhout  
719 T, Kwon-Chung KJ, Meyer W. 2004. A rare genotype of *Cryptococcus gattii* caused the  
720 cryptococcosis outbreak on Vancouver Island (British Columbia, Canada). Proc Natl Acad  
721 Sci U S A 101:17258-63.
- 722 39. NPR-News. 2010. Fungal disease spreads through Pacific Northwest;  
723 <http://www.npr.org/templates/story/story.php?storyId=126198896>.
- 724 40. Alangaden GJ. 2011. Nosocomial fungal infections: epidemiology, infection control, and  
725 prevention. Infect Dis Clin North Am 25:201-25.

- 726 41. Neofytos D, Horn D, Anaissie E, Steinbach W, Olyaei A, Fishman J, Pfaller M, Chang C,  
727 Webster K, Marr K. 2009. Epidemiology and outcome of invasive fungal infection in adult  
728 hematopoietic stem cell transplant recipients: analysis of Multicenter Prospective  
729 Antifungal Therapy (PATH) Alliance registry. *Clin Infect Dis* 48:265-73.
- 730 42. Achterman RR, Smith AR, Oliver BG, White TC. 2011. Sequenced dermatophyte strains:  
731 growth rate, conidiation, drug susceptibilities, and virulence in an invertebrate model.  
732 *Fungal Genet Biol* 48:335-41.
- 733 43. Butler MS. 2008. Natural products to drugs: natural product-derived compounds in clinical  
734 trials. *Nat Prod Rep* 25:475-516.
- 735 44. Jansen BJ, de Groot A. 2004. Occurrence, biological activity and synthesis of drimane  
736 sesquiterpenoids. *Nat Prod Rep* 21:449-77.
- 737 45. Toyota M, Ooiso Y, Kusuyama T, Asakawa Y. 1994. Drimane-type sesquiterpenoids from  
738 the liverwort *Diplophyllum serrulatum*. *Phytochemistry* 35:1263-1265.
- 739 46. Robles-Kelly C, Rubio J, Thomas M, Sedan C, Martinez R, Olea AF, Carrasco H, Taborga  
740 L, Silva-Moreno E. 2017. Effect of drimenol and synthetic derivatives on growth and  
741 germination of *Botrytis cinerea*: Evaluation of possible mechanism of action. *Pestic*  
742 *Biochem Physiol* 141:50-56.
- 743 47. Giaever G, Shoemaker DD, Jones TW, Liang H, Winzeler EA, Astromoff A, Davis RW.  
744 1999. Genomic profiling of drug sensitivities via induced haploinsufficiency. *Nat Genet*  
745 21:278-83.
- 746 48. Kubo I, Fujita K, Lee SH. 2001. Antifungal mechanism of polygodial. *J Agric Food Chem*  
747 49:1607-11.

- 748 49. Fujita K, Kubo I. 2005. Multifunctional action of antifungal polygodial against  
749 *Saccharomyces cerevisiae*: involvement of pyrrole formation on cell surface in antifungal  
750 action. *Bioorg Med Chem* 13:6742-7.
- 751 50. Veerapandian R, Vedyappan G. 2019. Gymnemic acids inhibit adhesive nanofibrillar  
752 mediated *Streptococcus gordonii-Candida albicans* mono-species and dual-species  
753 biofilms. *Front Microbiol* 10: 2328.
- 754 51. Mor V, Rella A, Farnoud AM, Singh A, Munshi M, Bryan A, Naseem S, Konopka JB,  
755 Ojima I, Bullesbach E, Ashbaugh A, Linke MJ, Cushion M, Collins M, Ananthula HK,  
756 Sallans L, Desai PB, Wiederhold NP, Fothergill AW, Kirkpatrick WR, Patterson T, Wong  
757 LH, Sinha S, Giaever G, Nislow C, Flaherty P, Pan X, Cesar GV, de Melo Tavares P,  
758 Frases S, Miranda K, Rodrigues ML, Luberto C, Nimrichter L, Del Poeta M. 2015.  
759 Identification of a New Class of Antifungals Targeting the Synthesis of Fungal  
760 Sphingolipids. *MBio* 6:e00647.
- 761 52. Proctor M, Urbanus ML, Fung EL, Jaramillo DF, Davis RW, Nislow C, Giaever G. 2011.  
762 The automated cell: compound and environment screening system (ACCESS) for  
763 chemogenomic screening. *Methods Mol Biol* 759:239-69.
- 764
- 765
- 766
- 767
